# Supplementary material for: Formulation development and comparability studies with an aluminum-salt adjuvanted SARS-CoV-2 spike ferritin nanoparticle vaccine antigen produced from two different cell lines
Source: PubMed Central journal article supplement (PMC11181998; doi:10.1016/j.vaccine.2023.08.037), 2023-08-22
Supplement: NIHMS2001717-supplement-1.pdf [file NIHMS2001717-supplement-1.pdf]

|                                                             | CHO | Expi293 |
|-------------------------------------------------------------|-----|---------|
| Overall Sequence Coverage<br>(not including signal peptide) | 94% | 92%     |
| Sequence Coverage of Spike Portion                          | 93% | 91%     |
| Sequence Coverage of Ferritin Portion                       | 98% | 98%     |

**CHO DCFHP**  
**Expi293 DCFHP**  
Ferritin

10 20 30 40 50 60 70 80 90 100 110 120  
MFVFLVLLPL VSSQCVNLTT RTQLPPAYTN SFTRGVVYYPD KVERSSVLHS TQDLFLPFES NVTWFHAIHV SGTNGTKRFD NPVLPFNDGV YFASTEKSNI IRGWIFGTTL DSKTQSLLIIV

130 140 150 160 170 180 190 200 210 220 230 240  
NNATNVVIVK CEFQFCNDPF LGVYYHKNNK SWMESEFRVY SSANCTFEY VSQPFLLMDE GKQGNFKNLR EFVFKNDIGY FKIYSKHTPI NLVRDLPQGF SALEPLVDLP IGINITRFQT

250 260 270 280 290 300 310 320 330 340 350 360  
LLALHRSYLT PGDSSSGWTA GAAAYVGYL QPRTFLLKYN ENGTITDAVD CALDPLSETK CTLKSFTVEK GIYQTSNFRV OPTESIVRFP NITNLCPFGE VFNATRFASV YAWNRKRISN

370 380 390 400 410 420 430 440 450 460 470 480  
CVADYSVLYN SASFSTFKCY GVSPTKLNLD CFTNVYADSF VIRGDEVQRQI APGQTGKIAD YNYKLPDDFT GCVIAWNSNN LDSKVGNGYN YLYRLEFRKS LKPFERDIST EIYQAGSTPC

490 500 510 520 530 540 550 560 570 580 590 600  
NGVEGFNCYF PLQSYGFQPT NGVGYQPYRV VVLSFELLHA PATVCGPKKS TNLVKNKCVN FNFNGLTGTG VLTESNKKFL PFQQFGRDIA DTTDAVRDPQ TLEILDITPC SFGGVSVITP

610 620 630 640 650 660 670 680 690 700 710 720  
GTNTSNQVAV LYQDVNCTEV PVAIHADQLT PTWRVYSTGS NVFQTRAGCL IGAEHVNNYS ECDIPIGAGI CASYQTQNS PGSASSVASQ SIIAYTMSLG AENSVAYSNN SIAIPTNFTI

730 740 750 760 770 780 790 800 810 820 830 840  
SVTTEILPVS MTKTSVDCTM YICGDSTEC S NLLLOYGSFC TQLNRLTGI AVEQDKNTOE VFAQVKQIYK TPPIKDFGGF NFSQILPDPS KPSKRSPIED LLFNKVTIAD AGFIKQYGDC

850 860 870 880 890 900 910 920 930 940 950 960  
LGDIAARDLI CAQKFNGLTV LPPLTDEMI AQYTSALLAG TITSGWTFGA GPALQIPFPM QMAYRFNGIG VTQNVLYENQ KLIANQFNSA IGKIQDSLSS TPSALGKLQD VVNQNAQALN

970 980 990 1000 1010 1020 1030 1040 1050 1060 1070 1080  
TLVKQLSSNF GAISSVLNDI LSRLDPPEAE VQIDRLITGR LQSLQTYVTO QLIRAAEIRA SANLAATKMS ECVLQSKRV DFCGKGYHLM SFPOSAPHGV VFLHVTYVPA QEKNFTTAPA

1090 1100 1110 1120 1130 1140 1150 1160 1170 1180 1190 1200  
ICHGKAHFP REGVFSNGT HWFVTQRNFY EPQIITTDNT FVSGNCDVVI GIVNNTVYDP LQPELDSGGD IIKLLNEQVN KEMQSSNLYM SMSSWCYTHS LDGAGLFLFD HAAEYEHAK

1210 1220 1230 1240 1250 1260 1270 1280 1290 1300 1310  
KLIIIFLNENN VPVQLTSISA PEHKFEGLTQ IFQKAYEHEQ HISESINNIV DHAIKSKDHA TFNQLQWYVA EQHEEEVLFN DILDKIELIG NENHGLYLAD QYVKGIAKSR KS
