# Supplementary material for: Formulation development and comparability studies with an aluminum-salt adjuvanted SARS-CoV-2 spike ferritin nanoparticle vaccine antigen produced from two different cell lines
Source: PubMed Central journal article supplement (PMC11181998; doi:10.1016/j.vaccine.2023.08.037), 2023-08-22

| Glycan   | Average Relative Fluorescence Peak Area Abundance $\pm$ 1SD (%) | Average Relative Ion Abundance $\pm$ 1SD (%) | Structure                                                                             |
|----------|-----------------------------------------------------------------|----------------------------------------------|---------------------------------------------------------------------------------------|
| H3N4F1   | 21.4 $\pm$ 0.5                                                  | 24.5 $\pm$ 0.1                               | 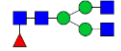   |
| H5N2     | 13.1 $\pm$ 0.0                                                  | 12.6 $\pm$ 0.1                               |    |
| H3N5F1   | 9.6 $\pm$ 0.3                                                   | 10.6 $\pm$ 0.0                               |    |
| H4N4F1   | 6.4 $\pm$ 0.1                                                   | 7.2 $\pm$ 0.1                                |    |
| H3N3F1   | 5.6 $\pm$ 0.1                                                   | 5.6 $\pm$ 0.0                                |    |
| H4N4F1S1 | 10.2 $\pm$ 0.1*<br>(elutes at same time as H5N4F1)              | 5.4 $\pm$ 0.0                                |    |
| H4N4F1   | 6.4 $\pm$ 0.1                                                   | 3.5 $\pm$ 0.0                                |    |
| H4N5F1   | 2.0 $\pm$ 0.1                                                   | 2.8 $\pm$ 0.0                                |    |
| H5N4F1   | 10.2 $\pm$ 0.1*<br>(elutes at same time as H4N4F1S1)            | 2.8 $\pm$ 0.0                                |    |
| H7N2     | 4.4 $\pm$ 0.1                                                   | 2.6 $\pm$ 0.0                                |  |

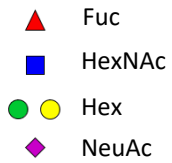

Supplement: NIHMS2001717-supplement-3.pdf [file NIHMS2001717-supplement-3.pdf]
