# Supplementary material for: Formulation development and comparability studies with an aluminum-salt adjuvanted SARS-CoV-2 spike ferritin nanoparticle vaccine antigen produced from two different cell lines
Source: PubMed Central journal article supplement (PMC11181998; doi:10.1016/j.vaccine.2023.08.037), 2023-08-22

| Glycan   | Average Relative Fluorescence Peak Area Abundance $\pm$ 1SD (%) | Average Relative Ion Abundance $\pm$ 1SD (%) | Structure |
|----------|-----------------------------------------------------------------|----------------------------------------------|-----------|
| H5N4F1   | 13.8 $\pm$ 0.3                                                  | 14.1 $\pm$ 0.1                               |           |
| H5N2     | 10.7 $\pm$ 0.4                                                  | 13.8 $\pm$ 0.2                               |           |
| H5N4F1S1 | 10.9 $\pm$ 0.2                                                  | 10.9 $\pm$ 0.2                               |           |
| H4N4F1   | 4.4 $\pm$ 0.0                                                   | 4.2 $\pm$ 0.0                                |           |
| H6N2     | 3.0 $\pm$ 0.1                                                   | 4.2 $\pm$ 0.0                                |           |
| H6N5F1   | 5.1 $\pm$ 0.1                                                   | 4.2 $\pm$ 0.1                                |           |
| H7N2     | 3.6 $\pm$ 0.1                                                   | 4.1 $\pm$ 0.0                                |           |
| H5N4     | 3.4 $\pm$ 0.0                                                   | 3.8 $\pm$ 0.1                                |           |
| H6N5F1S1 | 4.8 $\pm$ 0.1                                                   | 3.8 $\pm$ 0.1                                |           |
| H5N4F1S2 | 4.5 $\pm$ 0.1                                                   | 3.3 $\pm$ 0.1                                |           |

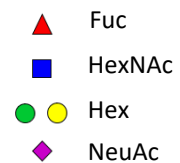

Supplement: NIHMS2001717-supplement-4.pdf [file NIHMS2001717-supplement-4.pdf]
