# Supplementary material for: Formulation development and comparability studies with an aluminum-salt adjuvanted SARS-CoV-2 spike ferritin nanoparticle vaccine antigen produced from two different cell lines
Source: PubMed Central journal article supplement (PMC11181998; doi:10.1016/j.vaccine.2023.08.037), 2023-08-22
Supplement: NIHMS2001717-supplement-5.pdf [file NIHMS2001717-supplement-5.pdf]

| <b>Formulation</b>        | <b>Final DCHFP concentration (mcg/mL)</b> | <b>Antigen amount (per 0.1 mL) (mcg)</b> | <b>Aluminum concentration (mg/mL)</b> | <b>Aluminum amount (per 0.1 mL) (mcg)</b> | <b>IM route injection volume (mL)</b> | <b>% Antigen bound to AH</b> |
|---------------------------|-------------------------------------------|------------------------------------------|---------------------------------------|-------------------------------------------|---------------------------------------|------------------------------|
| AH                        | 100                                       | 10                                       | 1.5                                   | 150                                       | 0.1                                   | 100%                         |
| AH+20mM sodium phosphate  | 100                                       | 10                                       | 1.5                                   | 150                                       | 0.1                                   | ~40%                         |
| AH+200mM sodium phosphate | 100                                       | 10                                       | 1.5                                   | 150                                       | 0.1                                   | ~10%                         |
| No adjuvant               | 100                                       | 10                                       | 0                                     | 0                                         | 0.1                                   | N/A                          |
